# Supplementary material for: Genetic and compound screens uncover factors modulating cancer cell response to indisulam
Source: Life Sci Alliance. 2022 May 9;5(9):e202101348. doi: 10.26508/lsa.202101348 (PMC9095732; doi:10.26508/lsa.202101348)
Supplement: Supplementary file 8 [file LSA-2021-01348_SdataF4.2.xlsx]

## Sheet: Figure 4B
	HCT-116			HCT-116R			HCC-1806			HCC-1806R			A549			A549R			Panc10.05			Panc10.05R
0.0013	109.407	110.501	113.072	115.148	114.215	115.049	100.209	101.967	103.42	99.5738	100.192	100.562	103.654	100.574	100.374	99.8975	100.888	97.6712	110.516	103.678	105.713	119.056	120.28	112.024
0.00160743	103.085	105.701	113.366	113.773	115.024	113.446	99.199	103.231	99.3039	100.672	98.7991	100.987	103.23	100.129	101.535	100.806	101.41	101.918	110.135	107.711	101.42	113.993	120.465	113.052
0.00198757	104.463	110.863	113.174	115.077	115.784	113.174	101.207	103.46	98.8554	100.921	100.021	101.06	102.255	100.314	99.9787	101.787	100.26	102.788	115.719	110.239	107.558	121.341	124.837	110.437
0.00245761	106.569	110.716	112.234	115.641	114.987	114.668	102.792	100.984	103.199	99.0849	98.6096	102.043	101.174	97.5134	98.978	102.873	99.5962	101.924	112.286	105.81	105.797	111.816	120.003	107.079
0.0030388	103.669	110.75	112.816	115.327	114.034	113.751	99.0986	101.093	102.069	101.21	102.284	100.494	102.195	101.98	99.5996	99.6131	100.222	99.5896	113.169	110.527	105.663	112.799	116.456	98.7533
0.00375744	103.629	107.852	111.575	115.239	112.839	112.497	100.322	100.993	103.368	101.623	99.2765	99.8109	100.015	101.144	101.907	103.234	100.255	101.32	110.948	107.541	108.497	112.027	116.131	108.749
0.00464603	108.283	108.051	112.218	113.262	113.379	111.878	99.1075	101.316	100.642	95.977	100.09	98.979	102.714	99.1153	102.896	102.963	100.546	102.719	110.917	106.311	103.534	117.346	114.437	96.5635
0.00574476	104.4	108.301	108.448	114.734	112.6	113.083	98.2769	99.279	100.019	96.6753	96.6219	94.3535	100.907	100.385	99.5816	98.8005	101.398	100.06	110.752	107.158	98.7697	108.966	112.12	108.836
0.00710332	100.122	110.018	108.004	112.952	112.542	108.057	96.3247	98.7341	96.9788	97.1465	94.9759	88.5072	102.951	100.779	99.2005	105.142	102.81	103.943	110.667	109.897	109.82	114.363	117.896	112.395
0.00878317	100.947	110.878	111.1	116.319	114.333	111.502	99.3196	98.5668	98.3485	97.6877	94.4477	99.9001	100.17	98.225	97.9614	98.3342	99.0491	97.3494	109.41	102.349	104.038	102.891	115.316	108.824
0.0108603	99.5977	107.908	111.973	114.146	115.699	112.785	99.0682	97.8947	100.463	98.1122	94.5502	99.3693	99.1397	98.5363	101.953	100.077	99.4875	100.168	95.0789	105.359	96.9101	113.285	112.73	112.11
0.0134286	103.091	106.649	112.25	113.644	115.066	114.217	99.2104	100.368	98.5767	96.8208	98.55	100.14	98.3318	99.0557	98.7196	99.7673	99.8497	101.056	113.066	98.4963	104.546	108.007	112.563	110.949
0.0166043	105.348	108.947	107.324	116.36	112.175	114.149	100.079	97.1827	96.0463	95.5771	97.1254	97.2977	99.1608	98.9339	100.628	100.264	98.0435	100.258	111.147	98.6685	104.073	107.846	116.831	106.852
0.020531	100.713	103.715	108.036	115.239	113.056	113.701	100.454	98.6404	96.1889	98.1599	98.1322	98.4321	99.4157	97.4218	97.8087	98.915	99.6086	100.393	99.0556	106.549	108.598	113.719	119.546	107.594
0.0253863	95.6655	102.448	105.803	114.827	112.882	110.843	96.4683	97.3168	94.5076	97.6464	93.3073	95.1153	98.2877	99.4248	99.875	100.493	100.19	100.478	108.477	104.933	109.222	117.552	118.224	102.582
0.0313899	96.3452	100.169	100.84	114.801	112.259	109.174	95.0889	92.5206	95.7494	95.9074	97.0087	95.199	99.6697	98.4349	101.111	100.004	98.1169	97.4187	112.22	105.864	102.189	114.508	119.827	107.882
0.0388132	92.0472	100.573	96.8711	114.669	112.329	110.744	92.5513	92.4014	88.4907	91.2151	93.8734	91.1186	98.9164	99.4657	100.06	97.3249	99.0415	101.186	103.398	105.503	103.273	115.332	122.168	105.061
0.047992	83.7718	89.7406	89.4899	113.665	111.131	108.657	85.5212	88.0157	83.3278	93.2536	94.6152	88.3967	98.6797	98.9943	99.6654	100.736	97.5937	99.0954	112.343	109.149	119.973	121.207	125.132	112.171
0.0593415	74.1215	84.1337	88.2468	113.117	114.418	114.898	85.1732	90.0735	79.9955	95.4223	92.6806	93.1463	100.497	98.683	100.461	98.5715	100.324	99.3044	123.645	112.891	113.329	118.121	117.186	111.615
0.0733751	60.2689	53.3258	62.812	115.604	114.44	113.56	85.3333	76.6796	79.149	95.5745	92.1072	100.309	99.7847	99.0539	103.002	101.016	99.7792	101.241	112.08	108.33	113.868	125.796	117.218	110.435
0.0907274	25.4564	30.2531	48.0212	114.443	113.916	113.017	71.3431	73.7616	76.5862	93.4201	94.4204	100.018	99.824	97.2688	100.559	100.428	98.9576	100.498	127.547	115.509	119.182	120.546	122.832	111.475
0.112183	18.061	17.5428	25.291	115.902	113.331	111.701	68.8435	61.4848	60.4395	94.4908	91.7608	96.3902	98.4698	98.9428	101.891	100.212	99.6953	101.502	121.996	115.095	127.383	126.54	124.538	108.723
0.138713	7.57975	7.02668	13.4064	116.831	114.078	111.061	51.6907	51.5196	51.0764	90.258	86.9229	92.7641	96.9527	95.7701	100.333	99.0157	98.2256	99.1737	138.795	129.602	130.644	128.317	122.585	112.813
0.171517	5.26926	3.73022	4.15924	114.656	113.302	111.232	44.2555	42.2407	39.1452	91.0372	90.9577	93.3151	92.0458	98.2632	100.846	99.2234	99.5886	100.146	129.657	131.513	150.52	123.683	123.996	104.523
0.212079	4.10496	2.45092	3.82455	115.916	114.102	112.511	25.5113	27.8225	18.5768	90.6928	89.3282	93.1031	84.3855	90.5945	93.783	100.549	98.7927	101.033	140.811	146	141.2	130.178	124.427	114.461
0.262233	2.21832	2.11235	2.31523	115.838	112.366	108.844	14.9339	17.0816	13.7006	85.4704	87.862	84.26	78.7445	81.4484	92.94	99.8144	100.154	103.079	131.679	142.502	142.177	137.525	128.498	109.686
0.324248	0.944185	2.40827	2.26096	112.176	111.623	110.843	5.14646	5.86915	5.05248	89.5868	86.3963	82.1897	76.9504	69.0309	73.1877	102.021	99.1015	102.651	118.78	129.512	121.622	132.064	131.949	122.405
0.400928	0.137837	1.54378	1.39129	115.302	111.72	112.14	2.54021	1.58411	3.33365	76.8861	79.4785	84.6302	50.2481	48.846	57.6826	98.782	99.743	99.8957	116.764	107.607	117.548	130.246	127.21	114.031
0.495743	0.741305	1.3732	1.84099	117.779	114.803	113.092	1.85435	1.61507	1.99717	83.9997	81.8696	86.248	28.2466	31.0331	33.5713	98.4607	99.2979	99.6293	89.9961	102.796	85.4959	131.762	131.46	115.346
0.61298	0.83693	0.948061	1.21814	114.523	114.88	112.865	0.716339	0.250258	1.21809	80.5023	84.0012	83.6646	11.3504	13.0024	14.9714	96.8475	96.3136	97.0344	76.5807	80.6816	83.5968	136.154	137.284	117.513
0.757942	1.3577	1.38612	1.60451	117.028	112.185	112.636	0.889073	0.0812694	1.11568	75.7418	76.4492	82.6234	3.68145	4.05466	10.823	95.1624	92.4439	95.4785	63.1122	60.0864	62.2184	124.485	131.949	112.286
0.937185	0.765858	1.40422	1.54636	116.873	113.768	112.837	0.477559	-0.144479	1.51753	79.5373	79.2411	78.5503	4.66666	3.18301	5.7487	92.1558	88.4694	91.0821	52.8993	53.4879	45.1486	132.097	131.233	114.872
1.15882	1.51276	1.66912	1.49467	115.955	112.585	112.179	0.273073	0.359907	0.652903	78.3427	77.5169	80.2695	3.89804	1.9965	2.39047	88.8141	84.5053	85.1971	37.8394	50.326	48.2283	135.164	132.611	103.971
1.43286	1.12639	1.34477	1.30988	116.41	114.143	111.529	0.248941	0.0335397	0.225124	74.9897	77.3742	79.2053	2.12888	1.65495	2.07221	87.0513	82.2845	87.0868	37.696	39.4153	39.5215	130.312	130.942	114.386
1.77172	1.98184	1.43911	1.66395	116.598	112.543	111.699	0.535984	-0.0304825	0.453427	71.8955	76.2799	73.6394	0.883944	1.17376	0.808131	78.2726	76.885	78.9724	36.7018	33.9385	34.8888	136.517	131.733	109.073
2.19071	0.658603	1.33702	1.25173	116.148	110.207	109.07	0.184165	0.318796	0.219728	78.4379	78.6309	70.1784	1.3363	1.22268	0.176591	75.821	68.8426	74.6503	33.4816	32.4088	31.8288	129.665	125.14	111.913
2.70878	1.3241	1.17291	1.65491	117.227	114.501	114.045	0.182895	0.650155	0.448088	67.8657	75.8394	79.7995	1.72444	1.53132	1.49654	70.4617	71.1043	83.4659	31.2574	37.4776	30.3941	124.113	126.518	110.77
3.34938	0.135253	1.37708	1.83711	116.178	116.461	114.706	0.777304	0.432147	0.822718	66.1357	71.7462	84.1089	1.19925	1.40591	1.69907	65.4902	63.7366	59.7051	32.5463	33.473	29.266	127.943	125.643	102.821
4.14146	0.756812	1.39775	2.00898	117.296	118.012	111.955	0.938607	0.303148	0.988644	68.5856	75.6526	76.5664	1.32192	0.256752	1.05656	56.3228	63.1	64.6354	29.9764	31.8408	29.8311	120.035	119.833	99.8873
5.12087	0.798163	1.24656	1.73632	117.032	114.134	113.299	0.585518	0.606295	0.862903	76.8784	73.8272	80.3518	1.36888	0.987871	1.46361	48.8636	50.9352	62.7318	33.9276	26.1589	27.5246	115.216	114.341	102.875
6.33189	0.570732	1.33314	1.62389	116.315	114.52	112.519	0.72396	0.161249	0.759199	75.8631	65.2009	83.3418	1.00182	0.445313	1.21319	49.9504	45.9951	49.3881	28.7701	31.8552	29.3208	115.479	107.345	97.9554
7.8293	0	2.03611	1.76216	117.464	113.45	113.993	0.646483	0.212848	0.801977	78.9942	78.6651	74.9567	1.43789	0.560051	1.32394	44.23	40.4651	43.1981	28.5638	32.5318	24.147	106.379	105.752	80.7579
9.68083	1.41068	1.25432	1.59805	117.364	113.443	108.217	0.297204	0.250258	0.593273	63.4691	81.4557	64.9604	0.468966	0.479112	0.929849	33.997	34.8483	39.1236	31.0256	29.1834	25.9256	98.3709	102.513	83.6758
11.9702	0.710292	1.13673	1.44428	111.964	110.849	103.713	0.894154	0.0812867	0.100338	62.418	64.2559	72.3274	1.37942	0.452428	0.774209	33.262	32.3597	34.4736	27.3299	24.8281	24.342	88.6748	87.0761	69.4938
14.801	1.53085	2.20669	1.77638	101.568	101.042	95.6693	0.543605	0.236239	0.458508	56.9096	61.8465	62.6339	2.37997	1.48685	2.80551	27.6506	35.0418	30.3684	24.2766	25.5007	18.3337	74.0872	79.849	63.8687
18.3013	0.335547	0.771027	0.507413	93.815	96.9409	92.2333	-0.0012701	-0.187049	0.0643829	44.6091	56.5474	60.4957	0.918445	1.34898	0.308287	29.0514	23.1067	25.248	24.4279	19.4866	24.1076	57.3079	65.8282	53.0088
22.6293	0.331671	0.910587	0.741305	73.6343	84.1737	74.8426	-0.208297	-0.559855	0.0229013	42.6404	47.7785	55.0209	0.83315	0.882028	1.93353	21.7058	18.3458	17.2911	23.0153	18.2522	20.2481	47.7171	50.6136	39.1264
27.9809	0	1.26595	0.680571	48.0406	63.3327	56.7178	0.0812867	-0.171569	0.489569	31.4372	35.0253	35.1161	1.37559	1.20578	1.86668	17.2717	13.5344	14.9241	18.5513	14.2803	17.5977	38.4733	43.6695	29.2995
34.598	0.300657	0.967445	1.13156	37.2647	41.865	34.3611	-0.106689	-0.396027	0.363828	19.0212	31.4276	21.4168	0.861901	1.40858	1.74197	8.80329	9.86678	10.902	16.4313	15.8818	16.9647	23.6131	29.5544	19.2531
42.78	0.773611	1.63165	2.32428	22.837	21.1623	22.094	0.699828	-0.510836	0.099383	14.0582	14.829	14.6658	1.39763	1.27872	1.76292	6.78106	6.34498	7.31082	16.2604	14.3829	17.8649	13.4976	21.7414	13.959
52.897	0.555225	1.40422	0.781364	13.4439	12.4321	14.5177	0.0495341	0.296698	0.542717	7.88768	11.0705	11.9094	1.68419	1.18799	2.05225	5.19468	5.56055	3.88502	13.7416	14.7786	13.6681	12.6259	15.1785	8.79038
65.4064	0.917048	1.08374	1.36933	7.88084	8.74404	8.73371	0.257831	-0.352167	0.550495	6.75884	8.06968	6.42514	1.47143	1.68341	2.09016	2.88621	2.91085	3.48688	13.4311	12.8614	14.1632	7.91831	11.288	7.77651
80.8742	0.754228	0.583654	1.08891	5.41657	5.5949	5.9606	0.431836	-0.3696	0.373411	3.45722	4.3082	4.50506	1.55097	1.18444	1.5993	2.43652	2.15788	2.57373	10.2777	10.4439	11.0944	7.13543	7.68053	4.51713
100	0.781364	0.911879	1.26078	1.35123	1.41843	1.77896	0.458508	-0.36198	0.656644	2.14013	2.27476	3.38483	1.2165	0.452428	1.25909	1.1253	0.99316	1.15448	6.34619	9.1459	5.89219	3.41107	3.96265	1.45287

## Sheet: Figure 4E
	Alternative 3' splice site	Alternative 5' splice site	Mutually exclusive exons	Retained introns	Skipped exons
Panc10.05R	425	219	289	371	2987
Panc10.05	688	351	713	630	5664

## Sheet: Figure 4F
drugName	par	res	res.par_diff.ratio	res.par_diff.abs
Rapamycin	3.57	1.65	-111345804978328	-1.92
Prexasertib	3.27	1.44	-118322182405577	-1.83
Navitoclax	2.79	1.39	-100518023910568	-1.4
Simurosertib	2.81	1.47	-0.934753975384562	-1.34
A-1155463	3.51	2.22	-0.660911353954455	-1.29
Tozasertib	3.56	2.35	-0.599216484401398	-1.21
BAY-1895344 (hydrochloride)	2.62	1.5	-0.804604311041569	-1.12
Talazoparib	2.77	1.65	-0.747419951803373	-1.12
AZD-8055	2.23	1.15	-0.95540984897593	-1.08
Decitabine	3.57	2.55	-0.485426827170242	-1.02
PD0166285	2.74	1.78	-0.622298651994129	-0.96
Doxorubicin (hydrochloride)	1.44	0.611	-123682452651095	-0.829
Telaglenastat	2.91	2.1	-0.470629825242161	-0.81
LY3177833	3.57	2.77	-0.366038097979911	-0.8
XL 413	3.57	2.79	-0.355658952199912	-0.78
IPI-3063	3.57	2.81	-0.345353943808173	-0.76
MK-5108	2.94	2.18	-0.431488020059438	-0.76
RSL3	2.96	2.2	-0.42809365210429	-0.76
AT9283	2.32	1.57	-0.563360246235945	-0.75
Torin 2	1.27	0.525	-127443916910604	-0.745
Mirin	2.99	2.27	-0.39745318690719	-0.72
Ixazomib	0.896	0.187	-226046046216997	-0.709
Litronesib	0.695	0	#NAME?	-0.695
Alisertib	2.47	1.81	-0.448521344501472	-0.66
Niraparib	2.81	2.15	-0.386233470631466	-0.66
Danusertib	2.32	1.68	-0.465663572348812	-0.64
Ouabain (Octahydrate)	1.81	1.18	-0.617202837721364	-0.63
GSK-1070916	2.46	1.83	-0.426814667055197	-0.63
IITZ-01	2.81	2.18	-0.366241995444	-0.63
PD 407824	3.1	2.47	-0.32775717368956	-0.63
GSK2334470	3.45	2.83	-0.285794308833649	-0.62
PKM2-IN-1	3.01	2.39	-0.332752868778953	-0.62
BPTES	3.57	2.97	-0.265461143228334	-0.6
Etoposide	2.78	2.18	-0.350756747946581	-0.6
ProTAME	3.34	2.76	-0.275179835695883	-0.58
Auranofin	2.56	2.01	-0.348948308821072	-0.55
BMS-303141	2.92	2.37	-0.301081309981758	-0.55
Rigosertib	1.49	0.947	-0.653875999881139	-0.543
Oxaliplatin	3.46	2.92	-0.244803668756707	-0.54
Adavosertib	2.24	1.71	-0.389502407171706	-0.53
Pracinostat	2.64	2.12	-0.316473664795254	-0.52
Olaparib	3.57	3.09	-0.208317236124725	-0.48
DC661	2.72	2.26	-0.267283878835152	-0.46
APY29	2.09	1.63	-0.358630977849805	-0.46
Geldanamycin	1.16	0.709	-0.710267272775418	-0.451
16F16	2.96	2.52	-0.232173442129033	-0.44
Nedisertib	2.67	2.23	-0.259796031767249	-0.44
D9	2.26	1.82	-0.312384322216491	-0.44
AMG 900	2.23	1.8	-0.30904680359063	-0.43
Empesertib	2.36	1.93	-0.290186012093761	-0.43
trans-C75	2.98	2.57	-0.213543971268284	-0.41
HA15	3.33	2.93	-0.184621512649014	-0.4
Cisplatin	2.04	1.65	-0.30610312772568	-0.39
V-9302	2.71	2.32	-0.2241680462263	-0.39
BIIB021	1.52	1.14	-0.415037499278844	-0.38
KNK437	3.57	3.19	-0.16236765026423	-0.38
Fisetin	3.41	3.04	-0.165700415580587	-0.37
pevonedistat (MLN4924)	1.69	1.33	-0.345597000780995	-0.36
(E)-Daporinad	0.561	0.229	-129265317251185	-0.332
CMPD1	2.01	1.69	-0.250172254896744	-0.32
5-Azacytidine	3.39	3.08	-0.138354922441442	-0.31
OSU-03012	2.77	2.46	-0.171227660709949	-0.31
ULK-101	3.23	2.92	-0.145565795813908	-0.31
Berzosertib	3.05	2.74	-0.154633349489722	-0.31
Daunorubicin (Hydrochloride)	0.771	0.469	-0.717142937399658	-0.302
Garcinol	2.72	2.42	-0.168599603975745	-0.3
Carboplatin	3	2.7	-0.15200309344505	-0.3
Sabutoclax	2.24	1.95	-0.200024608307994	-0.29
5-Fluorouracil	3.35	3.06	-0.130629442652483	-0.29
GSK-923295	2.45	2.16	-0.181750436839102	-0.29
SC75741	2.67	2.38	-0.165878168379611	-0.29
Tunicamycin	2.32	2.03	-0.192645077942396	-0.29
CCT241533 (hydrochloride)	3.06	2.81	-0.122961522471726	-0.25
Ceralasertib	3.37	3.13	-0.10658593424924	-0.24
AZD-7762	2.26	2.02	-0.161967479663393	-0.24
kira6	3.2	2.97	-0.107608974086597	-0.23
A-485	2.76	2.54	-0.119839770006003	-0.22
Oprozomib	0.756	0.543	-0.477434036416711	-0.213
Panobinostat	1.04	0.83	-0.325400286794167	-0.21
IACS-10759	0.546	0.339	-0.687615677783509	-0.207
(-)-Epigallocatechin Gallate	2.71	2.51	-0.1106054874031	-0.2
KW-2478	2.21	2.01	-0.136850868212503	-0.2
PX-12	2.76	2.57	-0.102899907584291	-0.19
(S)-Crizotinib	3.57	3.39	-0.0746388008927557	-0.18
Tanespimycin	0.49	0.315	-0.637429920615292	-0.175
ABT-737	3.41	3.24	-0.0737779261395477	-0.17
Barasertib-HQPA	1.98	1.81	-0.129510732996404	-0.17
MKC3946	3.57	3.4	-0.0703893278913979	-0.17
TH588	3.57	3.4	-0.0703893278913979	-0.17
3-AP	3.12	2.96	-0.0759488532332986	-0.16
Givinostat (hydrochloride monohydrate)	2.32	2.18	-0.0897966703506455	-0.14
Quisinostat	0.629	0.506	-0.313922632184979	-0.123
Chloroquine (diphosphate)	3.24	3.12	-0.0544477840223765	-0.12
Quercetin	3.43	3.32	-0.0470253348258877	-0.11
YM-155	0.141	0.0367	-194184319444294	-0.1043
Rucaparib	3.56	3.47	-0.0369415783881369	-0.0899999999999999
MKT 077	2.33	2.25	-0.0504049534372432	-0.0800000000000001
SCH900776	3.04	2.96	-0.0384741478146357	-0.0800000000000001
Vorinostat	2.96	2.88	-0.0395283641866375	-0.0800000000000001
BML-277	3.5	3.43	-0.0291463456595163	-0.0699999999999998
MRT68921 (dihydrochloride)	3.08	3.02	-0.0283818013698225	-0.0600000000000001
Venetoclax	3.27	3.22	-0.0222299473834655	-0.0499999999999998
Apcin	3.57	3.53	-0.0162558907579193	-0.04
U-104	3.36	3.33	-0.0129390557074981	-0.0299999999999998
CGK733	3.01	3	-0.00480098626382104	-0.00999999999999979
4Œº8C	3.57	3.57	0	0
AZD-5991	3.3	3.3	0	0
Cariporide	3.57	3.57	0	0
CCF642	1.26	1.26	0	0
Enasidenib	3.57	3.57	0	0
SBI-0206965	3.57	3.57	0	0
Bafilomycin A1	1.51e-114	4.25e-53	204130528079829	4.25e-53
Acetazolamide	3.56	3.57	0.00404683306270171	0.00999999999999979
ISRIB (trans-isomer)	3.54	3.57	0.0121747139461022	0.0299999999999998
AZD3965	3.53	3.57	0.0162558907579194	0.04
KU-60019	3.52	3.57	0.0203486453918024	0.0499999999999998
BAY-876	0.698	0.751	0.10558587130462	0.053
Daidzin	3.51	3.57	0.0244530437245389	0.0600000000000001
Nelfinavir	3.5	3.57	0.0285691521967709	0.0699999999999998
NCT-503	3.42	3.57	0.0619277491432017	0.15
Hydroxychloroquine sulfate	2.57	2.74	0.0924075337666489	0.17
AZD0156	3.36	3.57	0.0874628412503394	0.21
Rabusertib	3.33	3.57	0.100401896957837	0.24
L-Buthionine-(S	R)-sulfoximine	3.19	3.57	0.16236765026423
PF 3644022	2.31	2.91	0.333126301492226	0.6
5-Methyl-1H-pyrazol-3(2H)-one	2.89	3.57	0.304854581528421	0.68
Indisulam	2.49	3.57	0.519778331961019	1.08
STF-083010	2.17	3.57	0.71822903158462	1.4
(S)-Monastrol	NA	3.57	NA	NA
Alvespimycin (hydrochloride)	NA	NA	NA	NA
AZD1390	NA	3.57	NA	NA
BAY1217389	NA	0.00465	NA	NA
BI 2536	NA	NA	NA	NA
Bortezomib	NA	0.00994	NA	NA
Carfilzomib	NA	NA	NA	NA
CCT245737	NA	3.53	NA	NA
Dapagliflozin	3.57	NA	NA	NA
Devimistat	NA	NA	NA	NA
DHEA	NA	3.57	NA	NA
DTP3 (TFA)	NA	NA	NA	NA
Epothilone B	NA	0	NA	NA
Filanesib	NA	NA	NA	NA
GDC-0575 dihydrochloride	NA	2.95	NA	NA
Gemcitabine	0.474	NA	NA	NA
GSK2194069	NA	3.57	NA	NA
GSK2606414	NA	NA	NA	NA
GSK2656157	NA	3.57	NA	NA
GSK461364	NA	NA	NA	NA
Ispinesib	7.77e-06	NA	NA	NA
Luminespib	NA	NA	NA	NA
Marizomib	NA	NA	NA	NA
ND 646	NA	NA	NA	NA
NSC 109555	3.57	NA	NA	NA
Paclitaxel	NA	NA	NA	NA
QNZ	NA	NA	NA	NA
RAD51 Inhibitor B02	3.57	NA	NA	NA
RI-1	NA	3.57	NA	NA
Romidepsin	NA	NA	NA	NA
SB-743921	NA	NA	NA	NA
Thapsigargin	NA	NA	NA	NA
Vinblastine (sulfate)	NA	0.0765	NA	NA
Vincristine (sulfate)	3.86e-29	NA	NA	NA
Volasertib	NA	NA	NA	NA
VX 984 (M9831)	NA	3.5	NA	NA

## Sheet: Figure 4G
A-115463	Panc10.05			Panc10.05R
0.00533599	1.03206	1.08546	1.05931	1.02946	0.987824	1.07147
0.00960478	1.08823	1.19004	1.07962	1.00481	1.05045	1.09628
0.0172886	1.04834	1.11068	1.16929	1.03021	1.00653	1.04858
0.0311195	1.1607	1.22554	1.23384	1.01982	0.979181	0.974701
0.0560151	1.22724	1.20117	1.36702	0.982843	0.9761	0.991896
0.100827	1.24961	1.18548	1.30727	0.943255	0.927087	1.0111
0.181489	1.24695	1.25516	1.37305	0.842565	0.842506	0.960882
0.32668	1.21207	1.23491	1.38817	0.856833	0.74989	0.923696
0.588024	1.30413	1.25876	1.3863	0.816642	0.697624	0.833446
1.05844	1.29848	1.18553	1.42894	0.762312	0.617081	0.74008
1.9052	1.30131	1.14189	1.37951	0.780894	0.468181	0.690012
3.42936	1.2204	1.08534	1.35227	0.620715	0.496531	0.611016
6.17284	1.2298	1.05659	1.29587	0.541356	0.344167	0.474654
11.1111	1.10801	0.792288	1.05629	0.408018	0.266099	0.301883
20	0.674375	0.396734	0.484083	0.265496	0.159819	0.181001
ABT-263	Panc10.05			Panc10.05R
0.00266799	0.99607	1.08756	1.14011	1.03105	1.01132	1.08395
0.00480239	0.988887	1.10135	1.08688	1.04359	1.05259	1.05463
0.0086443	0.985263	1.0832	1.10768	1.00893	0.986636	1.05819
0.0155597	1.02305	1.15683	1.13999	1.00744	0.997931	1.08713
0.0280075	1.05748	1.08591	1.20223	1.00024	0.94742	1.0898
0.0504136	1.08054	1.03541	1.1538	0.981304	0.951729	1.07801
0.0907444	1.11592	1.04054	1.24241	0.96863	0.914274	1.02723
0.16334	1.05883	1.12702	1.30191	0.872528	0.895188	0.979373
0.294012	1.08535	1.1008	1.34484	0.683729	0.771985	0.845891
0.529221	0.93293	1.12721	1.33657	0.405307	0.562467	0.663649
0.952599	0.69896	1.01669	1.21879	0.139568	0.278331	0.315873
1.71468	0.448347	0.821595	1.11913	0.0586709	0.0979339	0.169968
3.08642	0.10981	0.127196	0.0505139	0.0111621	0.00141186	0.00553814
5.55556	0.0144567	0	0.00357072	0.0105141	0.00137228	0
10	0.0181833	0	0.00879073	0.0161429	0.00088406	0

## Sheet: Figure 4I
	Parental IND			Resistant UT			Resistant IND
20.1 μM A-1331852	11.12	9.67	9.78	38.88	45.43	43.08	54.25	51.1	53.74
14.8 μM A-1331852	11.96	18.56	13.92	37.6	45.28	37.19	62.06	62.57	62.06
13.1 μM BAD	5.2	-0.64	-1.49	14.42	19.32	27.25	22.69	21.96	32.13
10.0 μM BAD	0.93	0.29	3.05	17.78	27.69	26.34	25.12	34.98	33.01
200.1 μM HRK	-0.23	-3.09	-1.71	6.79	5.75	5.64	26.14	15.76	24.16
121.4 μM HRK	-0.76	-1.93	-2.35	-0.62	0.95	1.26	11.92	12.85	8.8
20.1 μM ABT-263	0.84	1.05	2.49	-0.08	-0.08	-0.49	11.11	12.23	13.24
14.8 μM ABT-263	1.15	0.94	0.94	0.33	-0.08	1.25	11.23	10.92	12.75

## Sheet: Figure 4K
	Panc10.05
UT	1	1	1
2 μM ABT-263	0.505	0.887	1.05
2 μM A-1155463	0.713	1.107	1.144
4 μM IND	0.693	0.418	0.963
IND + ABT-263	0.025	0.009	0.027
IND + A-1155463	0.034	0.001	0.041
